# Supplementary material for: Warming of 0.5 °C may cause double the economic loss and increase the population affected by floods in China
Source: Copernicus journal article supplement (doi:10.5194/nhess-22-1577-2022), 2022-05-10
Supplement: Supplementary file 1 [file nhess-22-1577-2022-supplement.pdf]

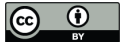

*Supplement of*

## **Warming of 0.5°C may cause double the economic loss and increase the population affected by floods in China**

**Lulu Liu et al.**

*Correspondence to:* Jiangbo Gao ([gaojiangbo@igsnr.ac.cn](mailto:gaojiangbo@igsnr.ac.cn))

The copyright of individual parts of the supplement might differ from the article licence.

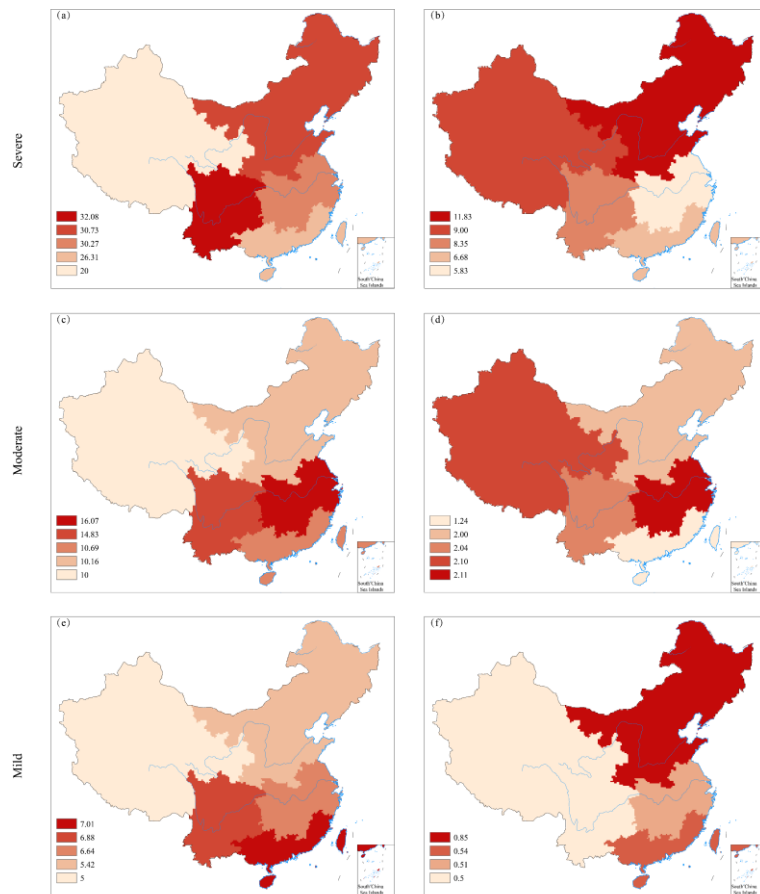

**Figure S1.** Affected population rate (a, c, e) and direct economic losses rate (b, d, f) of severe (a-b), moderate (c-d), and mild (e-f) floods (units: %)

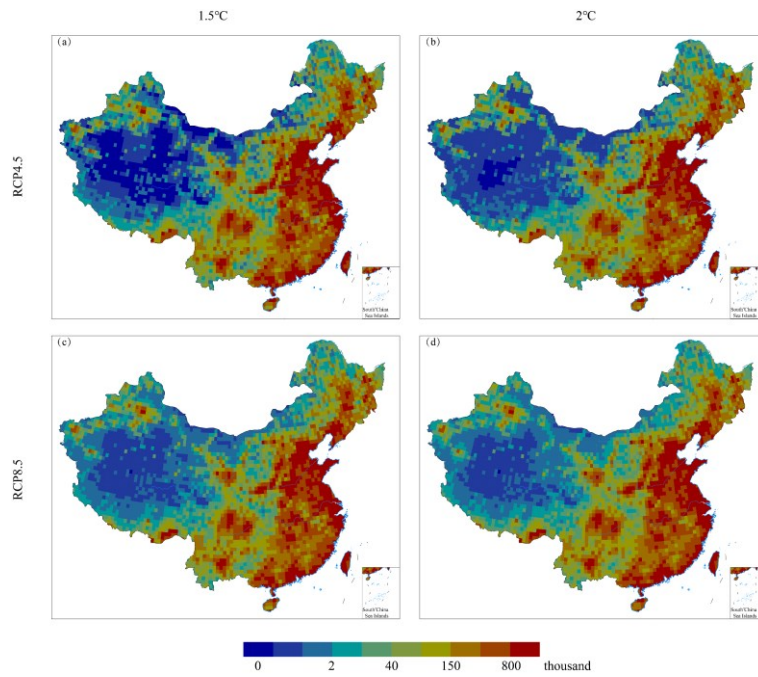

**Figure S2.** Spatial patterns of population in China for 1.5°C (a-b) and 2°C (c-d) of global warming under RCP4.5 (a, c) and RCP8.5 (b, d) scenarios

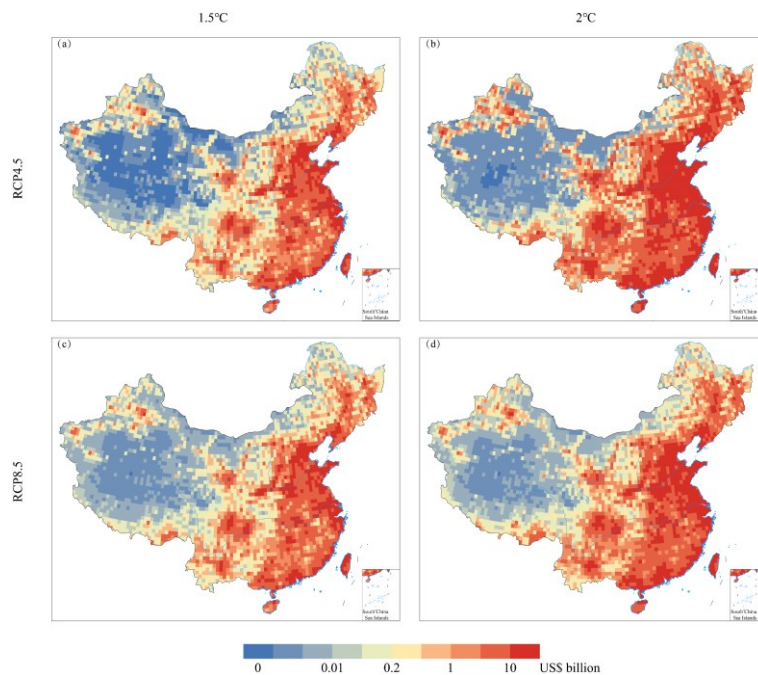

**Figure S3.** Spatial patterns of GDP in China for 1.5°C (a-b) and 2°C (c-d) of global warming under RCP4.5 (a, c) and RCP8.5 (b, d) scenarios

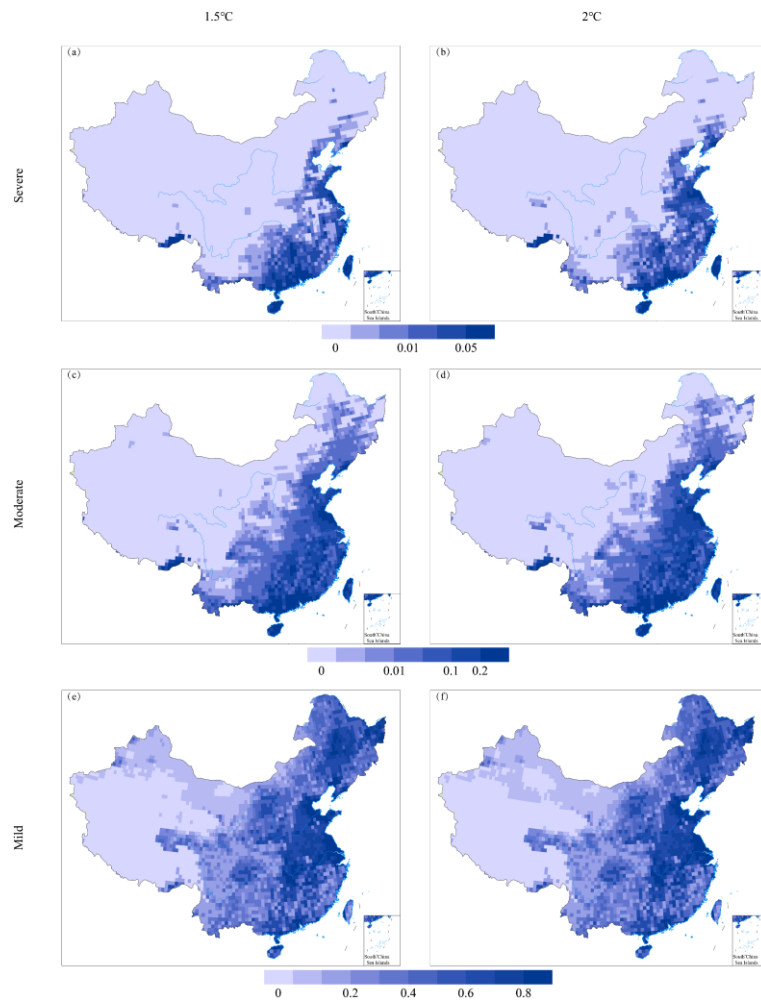

**Figure S4.** Spatial patterns of the probability of severe (a-b), moderate (c-d), and mild (e-f) floods for 1.5°C (a, c, e) and 2°C (b, d, f) of global warming under the RCP4.5 scenario

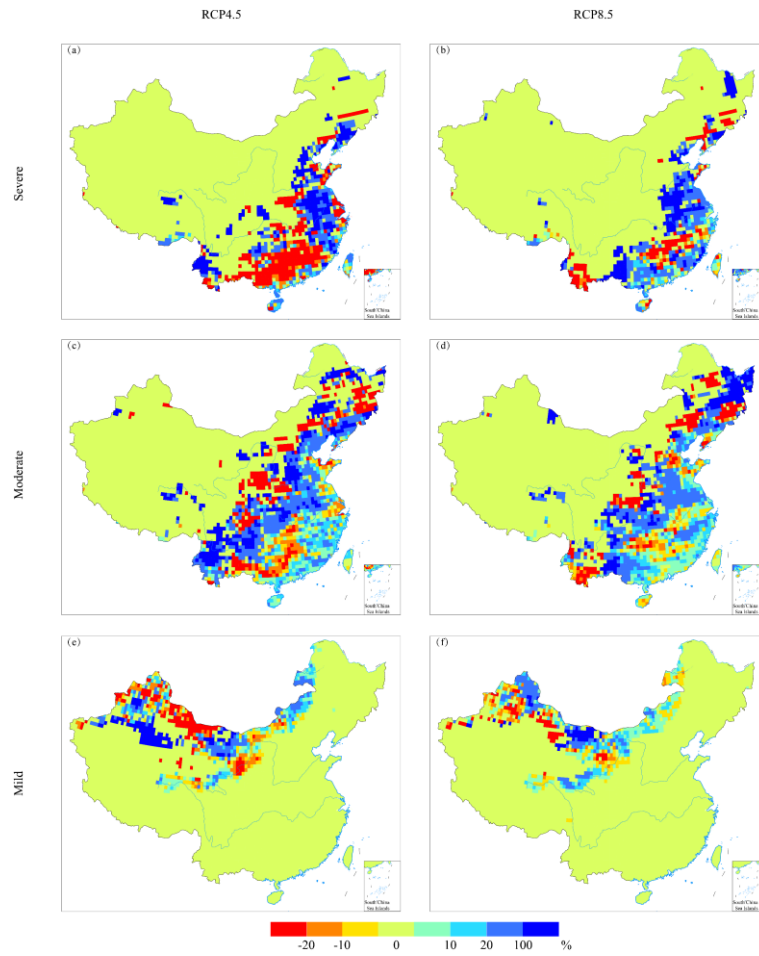

**Figure S5.** Spatial patterns in the variability of the probability of the severe (a-b), moderate (c-d), and mild (e-f) floods between 1.5°C and 2°C of global warming under the RCP4.5 (a, c, e) and RCP8.5 (b, d, f) scenarios

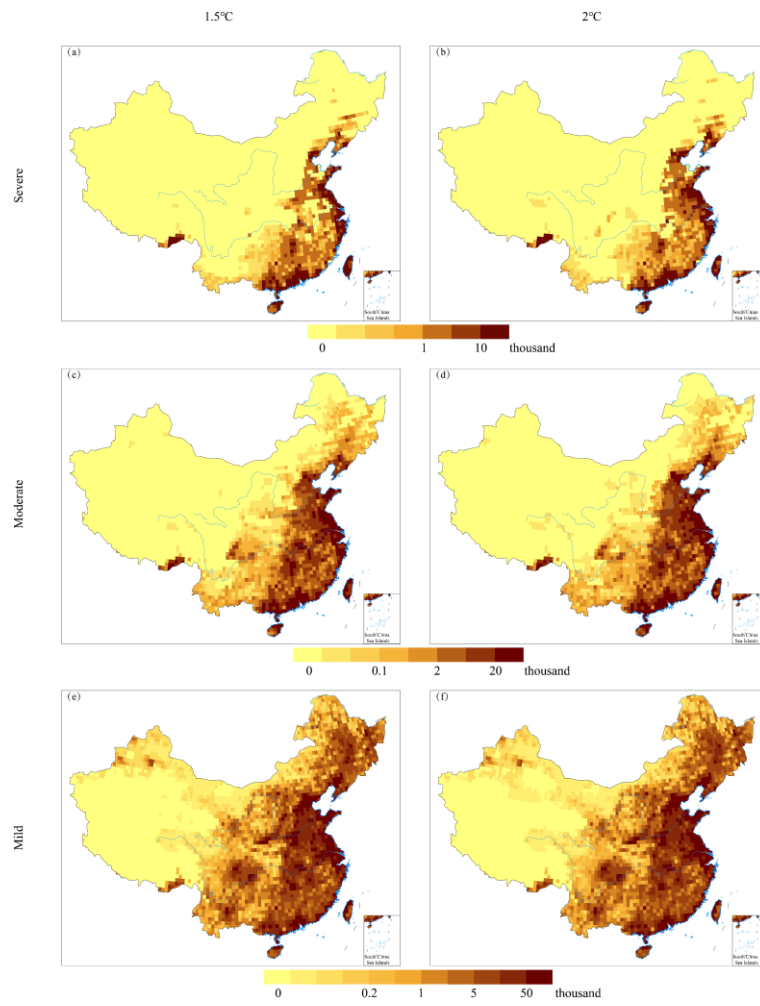

**Figure S6.** Spatial patterns of the population affected by the severe (a-b), moderate (c-d), and mild (e-f) floods for 1.5°C (a, c, e) and 2°C (b, d, f) of global warming under the RCP4.5 scenario

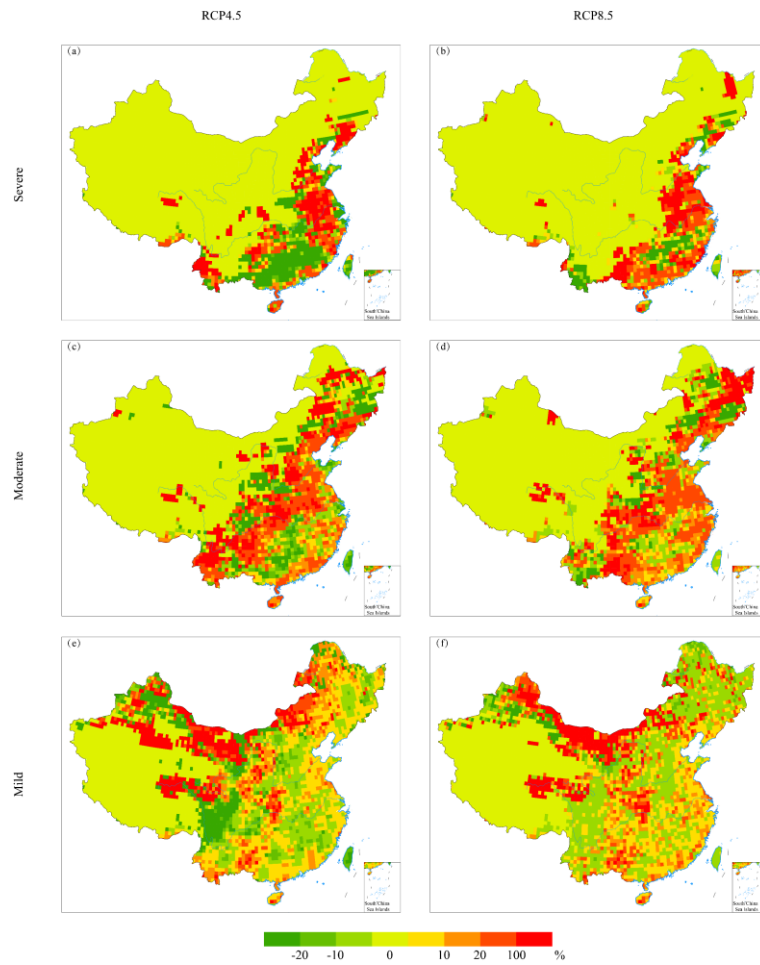

**Figure S7.** Spatial patterns in the variability of the population affected by the severe (a-b), moderate (c-d), and mild (e-f) floods between 1.5°C and 2°C of global warming under the RCP4.5 (a, c, e) and RCP8.5 (b, d, f) scenarios

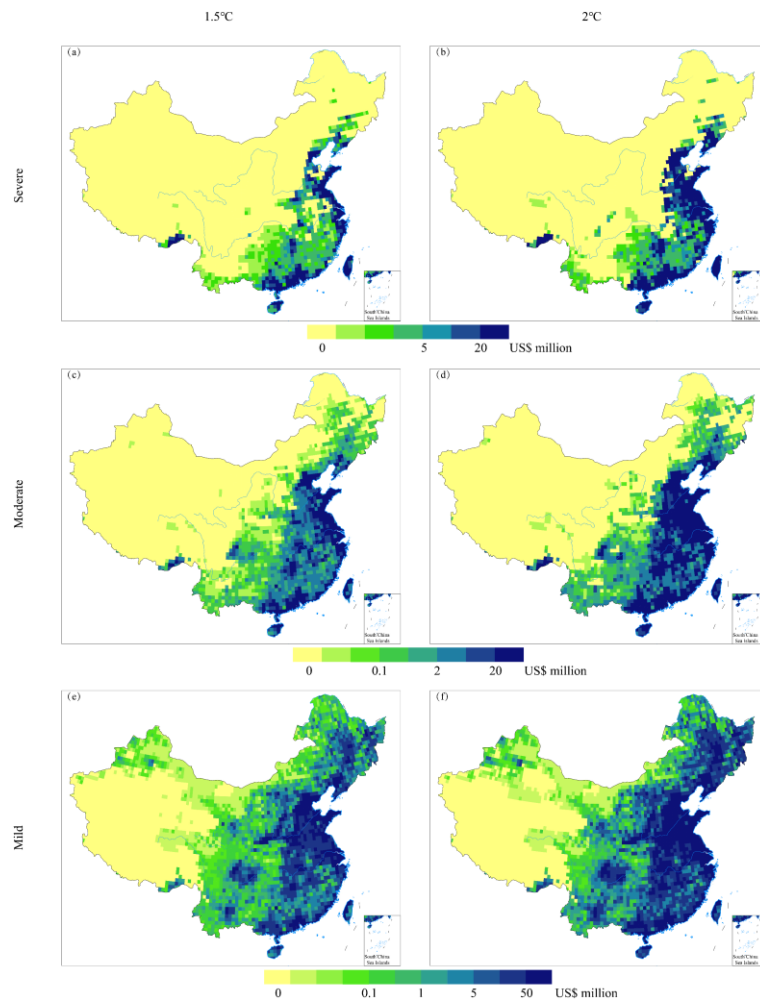

**Figure S8.** Spatial patterns of the economic risks posed by the severe (a-b), moderate (c-d), and mild (e-f) floods for 1.5°C (a, c, e) and 2°C (b, d, f) of global warming under the RCP4.5 scenario



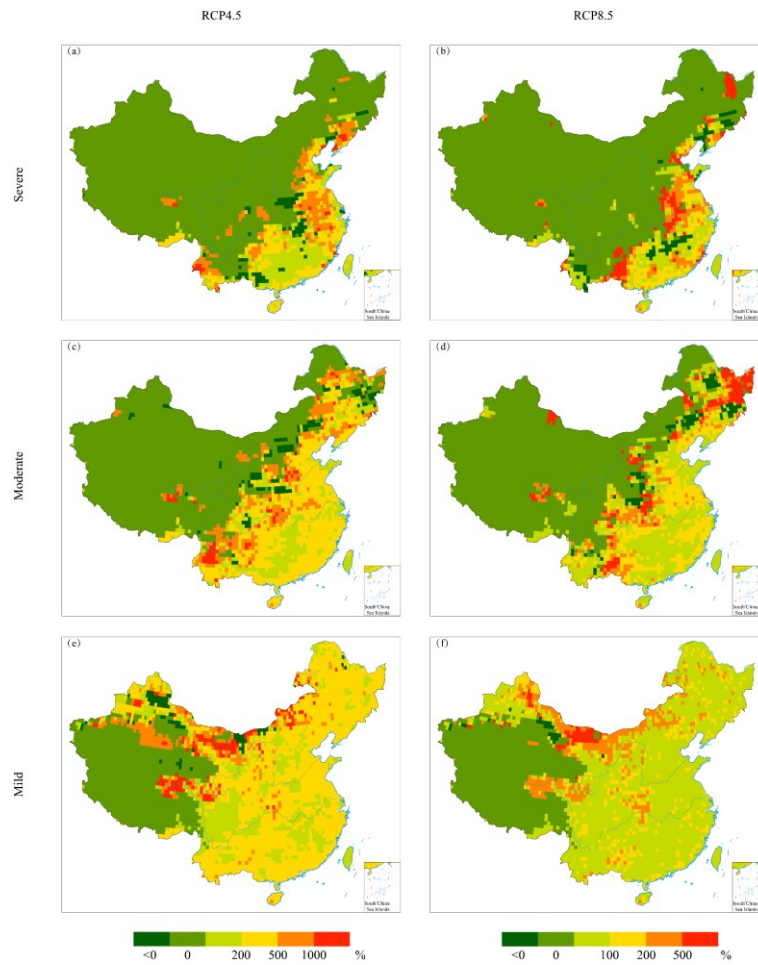

**Figure S9.** Spatial patterns in the variability of the economic risks posed by the severe (a-b), moderate (c-d), and mild (e-f) floods between 1.5°C and 2°C of global warming under the RCP4.5 (a, c, e) and RCP8.5 (b, d, f) scenarios
